# Supplementary material for: Insights into structure–activity relationships in efficient silica-supported Ni catalysts for selective hydrogenation of levulinic acid
Source: Royal Society of Chemistry journal article supplement (doi:10.1039/d3se00518f), 2023-01-01
Supplement: d3se00518f1.pdf [file d3se00518f1.pdf]

## **Insights into Structure-Activity Relationships in Efficient Silica-Supported Ni Catalysts for Selective Hydrogenation of Levulinic Acid**

**Vijaykumar Dosarapu<sup>a,b</sup>, Siddaramagoud Bandalla<sup>a</sup>, Ganesh Babu Bathula<sup>a</sup>, Madhu Ravula<sup>a</sup>, Satyanarayana Mavurapu<sup>a</sup>, Debaprasad Shee<sup>c</sup>, Mohan Varkolu<sup>d</sup>, Mallesham Baithy<sup>e,\*</sup> and Chandra Shekar Vasam<sup>a,e,\*</sup>**

*<sup>a</sup>Department of Pharmaceutical Chemistry, Telangana University, Nizamabad-503322, India*

*<sup>b</sup>Department of Chemistry, University College of Science, Satavahana University, Karimnagar-505 002, India*

*<sup>c</sup>Chemical Engineering Department, Indian Institute of Technology Hyderabad, Kandi - 502285, Sangareddy, India*

*<sup>d</sup>Department of Chemistry, College of Engineering, Koneru Lakshmaiah Education Foundation, R V S Nagar, Aziz Nagar (PO), Moinabad Road, Hyderabad- 500075, India*

*<sup>e</sup>Department of Chemistry, School of Science, Gandhi Institute of Technology and Management (GITAM) University, Hyderabad – 502329, Telangana, India*

*<sup>f</sup>Department of Chemistry, Guru Ghasidas Vishwavidyalaya (Central University), Bilaspur (CG), India.*

---

\*Corresponding Authors:

E-mail: mbaithy@gitam.edu; baithy.m@gmail.com (Dr. Mallesham Baithy)

E-mail: csvasam@telanganauniversity.ac.in (Dr. Chandra Shekar Vasam)

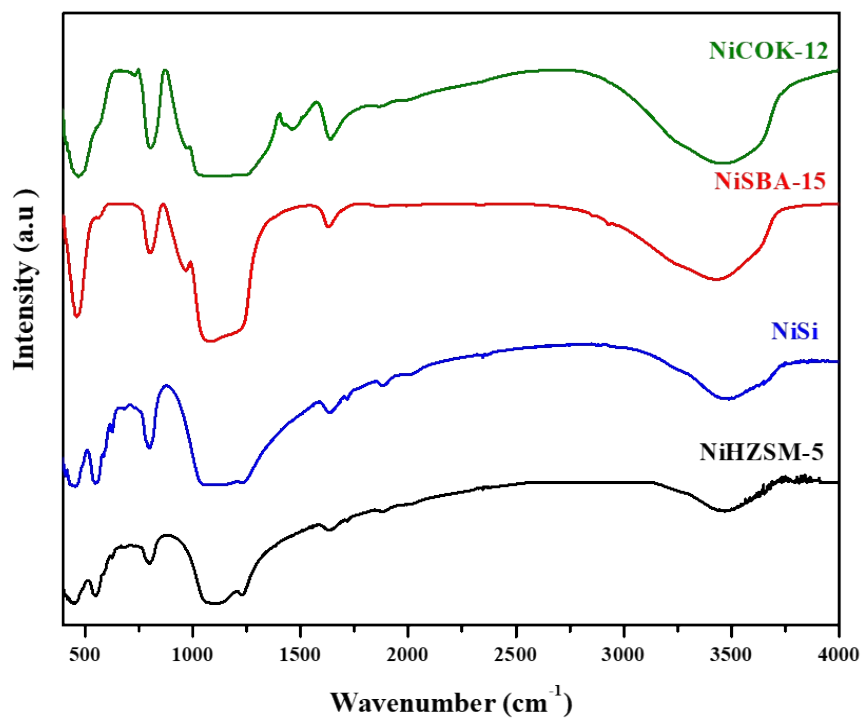

**Figure S1.** Pyridine FTIR spectra of NiO/HZSM-5 (NiHZSM-5), NiO/SiO<sub>2</sub> (NiSi), NiO/SBA-15 (NISBA-15), NiO/COK-12 (NiCOK-12) catalysts.
